## RESEARCH ARTICLE

# Comparative genomics and virulome analysis reveal unique features associated with clinical strains of *Klebsiella pneumoniae* and *Klebsiella quasipneumoniae* from Trinidad, West Indies

Aarti Pustam, Jayaraj Jayaraman , Adesh Ramsubhag\*

Department of Life Sciences, Faculty of Science and Technology, The University of the West Indies, St. Augustine, Trinidad and Tobago

\* [adesh.ramsubhag@gmail.com](mailto:adesh.ramsubhag@gmail.com)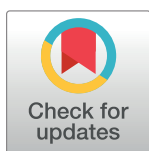

## Abstract

*Klebsiella pneumoniae* and *Klebsiella quasipneumoniae* are closely related human pathogens of global concern. The more recently described *K. quasipneumoniae* shares similar morphological characteristics with *K. pneumoniae* and is commonly misidentified as this species using traditional laboratory techniques. The vast mobilome in these pathogenic bacteria influences the dissemination of virulence factors in high-risk environments and it is, therefore, critical to monitor strains for developing effective clinical management strategies. Herein, this study utilized Illumina sequencing to characterize the whole genomes of nine clinical *K. pneumoniae* and one *K. quasipneumoniae* isolate obtained from patients of 3 major hospitals in Trinidad, West Indies. Reconstruction of the assembled genomes and implementation of several bioinformatic tools revealed unique features such as high pathogenicity islands associated with the isolates. The *K. pneumoniae* isolates were categorized as classical ( $n = 3$ ), uropathogenic ( $n = 5$ ), or hypervirulent ( $n = 1$ ) strains. *In silico* multilocus sequence typing, and phylogenetic analysis showed that isolates were related to several international high-risk genotypes, including sequence types ST11, ST15, ST86, and ST307. Analysis of the virulome and mobilome of these pathogens showed unique and clinically important features including the presence of genes associated with Type 1 and Type 3 fimbriae, the aerobactin and yersiniabactin siderophore systems, the K2 and O1/2, and the O3 and O5 serotypes. These genes were either on or in close proximity to insertion sequence elements, phage sequences, and plasmids. Several secretion systems including the Type VI system and relevant effector proteins were prevalent in the local isolates. This is the first comprehensive study investigating the genomes of clinical *K. pneumoniae* and *K. quasipneumoniae* isolates from Trinidad, West Indies. The data presented illustrate the diversity of Trinidadian clinical *K. pneumoniae* isolates as well as significant virulence biomarkers and mobile elements associated with these isolates. Additionally, the genomes of the local isolates will add to global databases and thus can be used in future surveillance or genomic studies in this country and the wider Caribbean region.

## OPEN ACCESS

**Citation:** Pustam A, Jayaraman J, Ramsubhag A (2023) Comparative genomics and virulome analysis reveal unique features associated with clinical strains of *Klebsiella pneumoniae* and *Klebsiella quasipneumoniae* from Trinidad, West Indies. PLoS ONE 18(7): e0283583. <https://doi.org/10.1371/journal.pone.0283583>

**Editor:** Rajesh P. Shastri, Yenepoya University, INDIA

**Received:** December 9, 2022

**Accepted:** March 12, 2023

**Published:** July 10, 2023

**Copyright:** This is an open access article, free of all copyright, and may be freely reproduced, distributed, transmitted, modified, built upon, or otherwise used by anyone for any lawful purpose. The work is made available under the [Creative Commons CC0](https://creativecommons.org/licenses/by/4.0/) public domain dedication.

**Data Availability Statement:** The dataset used and analyzed in this study is available via the [Supporting information](https://www.ncbi.nlm.nih.gov/bioproject/) files provided, or from the NCBI database (<https://www.ncbi.nlm.nih.gov/bioproject/>) under Bioproject ID PRJNA752893.

**Funding:** This study was partially funded by Campus Research and Publication Fund of the University of the West Indies, St. Augustine-Grant CRP.5.APR17.43(1). The funders had no role in

study design, data collection and analysis, decision to publish, or preparation of the manuscript.

**Competing interests:** The authors have declared that no competing interests exist.

**Abbreviations:** cKp, Classical *Klebsiella pneumoniae*; cKqp, Classical *Klebsiella quasipneumoniae*; hvKp, Hypervirulent *Klebsiella pneumoniae*; *K. pneumoniae*, *Klebsiella pneumoniae*; *K. quasipneumoniae*, *Klebsiella quasipneumoniae*; UPKp, Uropathogenic *Klebsiella pneumoniae*.

## Introduction

*Klebsiella pneumoniae* (*K. pneumoniae*) is an opportunistic pathogen associated with nosocomial infections like pneumonia, meningitis, and urinary tract infections (UTIs) as well as community-onset infections like liver abscesses and endophthalmitis [1]. While antibiotic resistance critically affects the treatment of infections caused by *K. pneumoniae*, virulence is also a major player that contributes to the severity of infections [2].

Although classical *K. pneumoniae* (cKp) strains carried traits of virulence, reports on the acquisition of virulence genes influenced its importance on the effect and severity of infections [1, 3]. The discovery of hypervirulent *K. pneumoniae* (hvKp) in the 1980s drastically improved the significance of virulence in *K. pneumoniae* as agents responsible for liver abscesses and endophthalmitis [4]. Since then, hvKp has been reported worldwide and is considered dangerous, with the potential for metastatic spread in healthy individuals [5, 6]. Mucoviscosity is one feature that has been correlated with hvKp strains and can be differentiated from traditional cKp strains by the phenotypic-based string test (string  $\geq 5$  mm) [7]. However, this is not a very reliable method since colony conditions and user techniques can easily influence the results [8]. While these features are rarely noted in cKp strains and appear to be unique to hvKp strains, they are associated with a significantly high mortality rate ranging from 3 to 42% in hvKp [5, 9]. It is also important to mention that uropathogenic *K. pneumoniae* (UPKp) also carries traits that play important roles in the persistence of UTIs [10].

Due to the significant heterogeneity in *K. pneumoniae* strains, virulence factors and secretion systems play different roles in pathogenicity [11]. Several virulence factors including those linked to adhesion, biofilm formation, capsular polysaccharide (CPS- K antigens), lipopolysaccharide (LPS- O antigens), and iron scavenging systems contribute to disease development and severity of infections by *K. pneumoniae*. Bacterial adhesion and biofilm formation are the two, first-step mechanisms of virulence, and they are mediated by the Type 1 and Type 3 fimbriae that are encoded by the *fim* and *mrkABCD* cluster of genes, respectively. A well-established characteristic of virulent *K. pneumoniae* is its ability to produce siderophores that scavenge iron from infected tissues in limited conditions [12]. Four siderophore systems are active in *K. pneumoniae*, namely enterobactin (*Ent*), salmochelin (*iro*), yersiniabactin (*ybt*), and aerobactin (*iuc*). The *Ent* system is typical of *K. pneumoniae* strains and is known to provide a limited supply of iron to the pathogen due to the hindrance of this system by lipocalin2 [11]. However, highly pathogenic strains are most often those that harbour the *iro*, *ybt*, and *iuc* systems that are commonly located in high pathogenicity islands [13].

The CPS and LPS are critical factors in the virulence of *K. pneumoniae* because they activate the host's innate immune response and protect the bacterium against antimicrobial peptides, phagocytosis, and opsonization and can repress early inflammatory responses [11, 14, 15]. Currently, seventy-eight CPS and eight LPS are known. Of significant importance in hypervirulent variants of *K. pneumoniae* are K1, K2, K5, K16, K20, K54, K57, and KN1 [16], and the O1, O2, O3, and O5 serotypes that are linked to virulence and severe clinical infections [17]. Additionally, the hypermucoviscosity *rmpA* gene has been identified as a positive regulator of capsular synthesis in hvKp strains [18].

Secretion systems also play a vital role in bacterial pathogenesis and can be used at any point in the bacterial infection pathway. These can be used for the delivery of toxins to eliminate competitors, cell adhesion, and effector translocation into host cells [19, 20]. The Type I (T1), Type II (T2), and Type IV (T4) secretion systems are common in pathogenic bacteria like *K. pneumoniae* [21, 22]. However, the Type VI secretion system (T6SS) is a recent observation in *K. pneumoniae* species and is regarded as a versatile weapon due to its ability to secrete a wide range of effectors and toxins, thereby promoting infections [23].

Due to the challenges faced by pathological labs to distinguish the nature of virulent strains, whole genome sequencing (WGS) and comparative genomics have become powerful tools for genotyping and characterizing these strains [24]. The genome of the *Klebsiella* species mainly range from 5.2Mb to 5.6Mb in size, with an average GC percent of 57 [25]. Several comparative genomics approaches have been applied to characterize *Klebsiella* strains and provided important information on traits of clinical, epidemiological, and ecological significance. Genes for many of these traits of significant importance are commonly located on mobile genetic elements (MGEs) like plasmids, insertion sequences, and transposons, which are often vectors of horizontal transmission [26]. The close genetic relationship among members of the *Enterobacteriaceae* family such as *E. coli*, *Citrobacter spp.*, and *K. pneumoniae* facilitates interspecies and intraspecies transmission via horizontal gene transfer, which has led to the emergence of strains with efficient characteristics that promote adaptation and general bacterial fitness [27].

Multi-locus sequence typing (MLST) is a popular genotyping method used to characterize relationships among bacterial strains and to track the global spread of resistant and virulent strains [28]. Through MLST, several sequence types (ST) have been linked to virulent *K. pneumoniae*, such as ST11, ST15, ST86, and ST307, which are either endemic or epidemic in some geographic regions including China and Europe [29, 30]. While there have been no reports of outbreaks linked to hvKp high-risk clones in the Caribbean, there has been one report of virulent strains belonging to ST11, ST15, and ST86 in this region [31].

Currently, there is a paucity of information on virulence factors and their associated MGEs in clinical *K. pneumoniae* isolates from Trinidad. This is the first comprehensive study to use a genomic approach to gain a deeper understanding of the genetic variations among clinical *K. pneumoniae* isolates originating from patients of three major hospitals in Trinidad, West Indies. We used comparative genomics to investigate the diversity and occurrence of virulence biomarkers in clinical hvKp, cKp, and UPKp isolates in order to bridge the knowledge gap of virulent *K. pneumoniae* in this country. This study's findings would add important genome characteristics of clinical *K. pneumoniae* isolates from Trinidad to global databases and guide medical practitioners and policy makers in developing and implementing systems to aid in managing outbreaks of these pathogens.

## Materials and methods

### Ethics approval

Ethics approval was granted by the University of the West Indies, St. Augustine, Trinidad (CEC010/09/15), as well as the regional health authorities responsible for the management of the three hospitals included in the study. Participant consent was waived since samples were collected from the microbiology laboratories of the hospitals and there was no interaction with patients nor were their identities made available to any of the authors.

### Background and selection of the local clinical *Klebsiella* isolates, growth conditions, and genomic DNA extraction

The ten clinical isolates used in this study are from a larger 2015–2017 study [32] and represent varying combinations of resistance genotypes and phenotypes as shown in S1 Table (Origin of local isolates). The isolates were selected randomly from genotype-phenotype profiles using the INDEX and Random functions in Microsoft<sup>®</sup> Excel<sup>®</sup> (Version 2301). All the isolates were from clinical specimens including urine, sputum, and wound swabs, and originated from patients of 3 major hospitals in Trinidad, West Indies. Species identification, antibiotic resistance profiles, and virulence gene characterization of the isolates were previously reported

[32]. While the *fimH* gene was present in most of the local isolates, there were differences in resistance phenotypes and genotypes of strains, e.g. some Non-ESBL/Carbapenemase producing isolates were found to contain ESBL genes using PCR [32] (See S1 Table). Of the ten selected isolates, nine were previously PCR confirmed as *K. pneumoniae* while one remained unidentified. The isolates were grown overnight at 30°C in Brain Heart Infusion Broth and the total genomic DNA was extracted using a modified CTAB protocol [33].

## Genome sequencing

Genomic DNA of the ten clinical isolates was sent to Novogene Corporation (USA) for whole genome sequencing using the Illumina HiSeq platform. The quality of the DNA was assessed using an Agilent 5400 Bioanalyzer, fragmented using sonification and the polished ends were ligated to Illumina adaptors that were amplified using index oligos P5 and P7. The amplified products were purified using the AMPure XP system, and the libraries were constructed using the NEBNext Ultra II DNA Library Prep Kit with an insert size of ~350 bp. Following this, the Agilent 2100 Bioanalyzer and qPCR were used to assess the size distribution and concentration of the libraries. Finally, the Illumina HiSeq platform (150bp PE to a depth of 1G) was used for whole genome sequencing, following which adapters and ligation sequences were removed, and the raw sequences were filtered to provide reads at a QC >30 and an error rate of ~0.03%.

## Whole genome assembly and annotation

Unless otherwise specified, the majority of the bioinformatic analysis was performed on the online server usegalaxy.eu [34]. The reads were checked for quality using FastQC (v0.73) and trimmed using Cutadapt (v4.0) to match a PHRED score  $\geq 30$ . Shovill (v1.1.0) with the spades assembler enabled was used to assemble the surviving reads. To assess the quality of the assembled multi-fasta contig file, the Quality Assessment Tool for Genome Assemblies (Quast v4.6.0) [35] was used. Prokka (v1.14.6) and RAST (v2.0) [36] were used to annotate the multi-fasta contig file. The genomes were submitted to the NCBI database under Bioproject ID PRJNA752893.

## Species identification and genome completeness

Species identity was determined using The Microbial Genome Atlas (MiGA) [37], *Klebsiella pneumoniae* BIGSdb-Pasteur (<https://bigsdb.pasteur.fr/klebsiella/>), and Kleborate [38]. Genome completeness was predicted using MiGA and BUSCO (v5.3.2).

## In silico MLST and phylogenetic analysis

*In silico* Multilocus Sequence Typing (MLST) was performed using MLST v2.0 [39], which is hosted on the Center for Genomic Epidemiology (CGE) (<http://www.genomicepidemiology.org/services/>) website. CSI phylogeny [40] was used to identify Single Nucleotide Polymorphisms (SNPs) in the local genomes and reference *K. pneumoniae* (strains that had a similar ST to the local isolates), *K. quasipneumoniae*, and *K. variicola* genomes downloaded from the NCBI Reference Sequence Database (RefSeq). SNP variability was then represented in NgPhylogeny (<https://ngphylogeny.fr/>) using the FastTree/OneClick workflow with the built-in MAFFT alignment algorithm, BMGE alignment curation, and FastTree inference using a bootstrap method of 1000 replicates.

## Comparative genomics, characterization, and feature annotation of the local genomes

The local genome alignments were ordered against references NTUH-K2044 and KqPF26 using progressiveMauve [41]. Genomic features of the ten local genomes were obtained from Prokka and the RAST server. Roary (v3.13.0) was used to conduct pangenome analysis for core genes (>90%) and accessory genes (<50%) similarities. The core and accessory genes were functionally characterized using COG (Cluster of Orthologous Group) with the embedded EggNog Mapper (v2.0) [42], and KEGG (Kyoto Encyclopedia of Genes and Genomes) database.

Mobile elements were annotated using RAST, Prokka, and the IS Finder database [43]. Putative integrative and conjugative elements (ICE) were predicted using ICEfinder [44] and the result underwent blast analysis (blastn with an adjusted 90% similarity parameter) against the in-house database to determine closely related ICE. Plasmid-derived contigs and fragments of plasmids were identified using plasmidVerify [45] and PlasmidFinder (v2.1) [46]. The PHASTER tool [47] was used to determine the presence of intact/complete phages.

The ordered genome files from progressiveMauve were used to predict virulence factors against reference genomes NTUH-K2044, HS11286, and MGH 78578 using the Virulence Factor Database (VFDB) server (<http://www.mgc.ac.cn/cgi-bin/VFs/genus.cgi?Genus=Klebsiella>). Capsular serotype (CPS/ K antigen) and Lipopolysaccharides (LPS/ O antigens) were predicted using Kaptive [48]. Manually curated databases and blastn were used to determine specific virulence factors of interest, including the presence of the regulator of mucoid phenotype (*rmpA* and *rmpA2*) genes. Secretion systems and effector proteins were identified using TXSScan MacSYFinder (v1.0.5), SecRet4 [49], and SecRet6 [50]. Circular plots of the gene coordinates of the virulence factors and secretion systems of the *K. pneumoniae* genomes were generated in the CgView server [51]. All heatmaps were generated using TBtools (v1.09) [52] and synteny maps were generated using Gene Graphics [53].

## Results

### Genome identity and general statistics

The reconstructed sequences of the local genomes were confirmed as *K. pneumoniae* (H1\_6, H1\_20, H1\_36, H2\_26, H2\_41, H2\_55, H2\_81, H3\_42, and H3\_66) and *K. quasipneumoniae* (H1\_16) via rMLST, MiGA, and Kleborate, and had >99% ANI (MiGA) to published strains. The genome sizes ranged from 5.4 to 5.6Mb. The local genomes were represented by 39 to 70 contigs ( $\geq 500$ bp) with a maximum contig length from 505,964 to 1,082,608 bp and a minimum contig length from 201 to 223 bp. The GC% ranged from 56.74 to 57.83%, which was similar to the references NTUH-K2044 (57.39%) and KqPF26 (57.84%). The genomes were estimated to be 98.4% complete (BUSCO), with less than 1% contamination (removed before downstream analysis), and had an estimated coverage of 209x to 266x. A total of 5,111 to 5,835 coding genes were predicted, with several rRNA genes (5s, partial16s, 23s) on multiple contigs. The overall statistical features of the ten sequenced genomes are shown in Table 1.

To establish the genomic population structure, the local isolates were assigned to STs based on the presence and allelic variations in seven housekeeping genes in the genomes (Table 1). Nine different STs were predicted including ST11, ST15, ST86, ST111, ST194, ST280, ST283, ST307, and ST528. To explore the diversity of the local isolates, wgSNP analysis was used to investigate the phylogeny of the ten *Klebsiella* genomes and forty-nine references (See S1 Table for the origin of the reference strains). As seen in Fig 1, there was a mix of clinical isolates from

Table 1. Draft de-novo assembled genome statistics of nine *K. pneumoniae* species and one *K. quasipneumoniae* species isolated from patients who utilized major hospitals in Trinidad, West Indies.

| Species: <i>K. pneumoniae</i> |                                                         |                                                         |                                                          |                                                          |                                                         |                                                        |                                                       |                                                        |                                                         |                                                         | Species: <i>K. quasipneumoniae</i> |
|-------------------------------|---------------------------------------------------------|---------------------------------------------------------|----------------------------------------------------------|----------------------------------------------------------|---------------------------------------------------------|--------------------------------------------------------|-------------------------------------------------------|--------------------------------------------------------|---------------------------------------------------------|---------------------------------------------------------|------------------------------------|
| Strain                        | H1_6                                                    | H1_20                                                   | H1_36                                                    | H2_26                                                    | H2_41                                                   | H2_55                                                  | H2_81                                                 | H3_42                                                  | H3_66                                                   | H1_16                                                   |                                    |
| NCBI Genome Accession         | JAIEZC000000000                                         | JAIEZE000000000                                         | JAIEZF000000000                                          | JAIEZG000000000                                          | JAIEZH000000000                                         | JAIEZI000000000                                        | JAIEZJ000000000                                       | JAIEZK000000000                                        | JAIEZL000000000                                         | JAIEZD000000000                                         |                                    |
| Size (Mb)                     | 5.4                                                     | 5.5                                                     | 5.6                                                      | 5.4                                                      | 5.5                                                     | 5.4                                                    | 5.4                                                   | 5.4                                                    | 5.6                                                     | 5.4                                                     |                                    |
| GC (%)                        | 57.14                                                   | 57.12                                                   | 56.93                                                    | 57.26                                                    | 57.19                                                   | 57.32                                                  | 57.32                                                 | 57.23                                                  | 56.74                                                   | 57.83                                                   |                                    |
| Estimated coverage (X)        | 226                                                     | 235                                                     | 223                                                      | 265                                                      | 266                                                     | 227                                                    | 253                                                   | 239                                                    | 209                                                     | 227                                                     |                                    |
| Contig number (≥ 500 bp)      | 59                                                      | 62                                                      | 60                                                       | 53                                                       | 70                                                      | 39                                                     | 57                                                    | 46                                                     | 62                                                      | 51                                                      |                                    |
| Max/min contig length (bp)    | 539,484/204                                             | 661,598/205                                             | 739,852/204                                              | 512,276/202                                              | 505,964/201                                             | 719,236/202                                            | 559,001/202                                           | 1,082,608/223                                          | 739,856/205                                             | 920,740/205                                             |                                    |
| Contig N50 (bp)               | 346,604                                                 | 302,493                                                 | 304,658                                                  | 307,999                                                  | 270,013                                                 | 436,854                                                | 265,046                                               | 474,974                                                | 282,908                                                 | 460,957                                                 |                                    |
| Total genes                   | 5,382                                                   | 5,553                                                   | 5,596                                                    | 5,403                                                    | 5,609                                                   | 5,364                                                  | 5,420                                                 | 5,404                                                  | 5,630                                                   | 5,333                                                   |                                    |
| Total CDS                     | 5,259                                                   | 5,421                                                   | 5,467                                                    | 5,277                                                    | 5,493                                                   | 5,244                                                  | 5,300                                                 | 5,294                                                  | 5,502                                                   | 5,207                                                   |                                    |
| Coding genes                  | 5,143                                                   | 5,321                                                   | 5,350                                                    | 5,190                                                    | 5,403                                                   | 5,146                                                  | 5,201                                                 | 5,198                                                  | 5,385                                                   | 5,111                                                   |                                    |
| RNA genes                     | 123                                                     | 132                                                     | 129                                                      | 126                                                      | 116                                                     | 120                                                    | 120                                                   | 110                                                    | 128                                                     | 126                                                     |                                    |
| rRNA                          | 6, 9, 12 (5s (4 partial), 16s (partial), 23s (partial)) | 9, 10, 15 (5s (7partial), 16s (partial), 23s (partial)) | 8, 11, 16 (5s (6 partial), 16s (partial), 23s (partial)) | 6, 12, 11 (5s (4 partial), 16s (partial), 23s (partial)) | 7, 7, 11 (5s (5 partial), 16s (partial), 23s (partial)) | 8, 8, 11 (5s (5partial), 16s (partial), 23s (partial)) | 8, 7, 9 (5s (6partial), 16s (partial), 23s (partial)) | 5, 8, 4 (5s (3 partial), 16s (partial), 23s (partial)) | 8, 9, 17 (5s (6 partial), 16s (partial), 23s (partial)) | 9, 9, 15 (5s (7 partial), 16s (partial), 23s (partial)) |                                    |
| tRNA                          | 84                                                      | 89                                                      | 84                                                       | 84                                                       | 80                                                      | 84                                                     | 80                                                    | 82                                                     | 83                                                      | 85                                                      |                                    |
| ncRNA                         | 12                                                      | 9                                                       | 10                                                       | 13                                                       | 11                                                      | 9                                                      | 16                                                    | 11                                                     | 11                                                      | 8                                                       |                                    |
| Total Pseudogenes             | 116                                                     | 100                                                     | 117                                                      | 87                                                       | 90                                                      | 98                                                     | 99                                                    | 96                                                     | 117                                                     | 96                                                      |                                    |
| MLST/CC                       | ST 111/ CC 0                                            | ST 194/ CC 137                                          | ST 15/ CC 0                                              | ST 307/ CC 0                                             | ST 11/ CC 0                                             | ST 86/ CC 0                                            | ST 280/ CC 0                                          | ST 528/ CC 0                                           | ST 15/ CC 0                                             | ST 283/ CC 31                                           |                                    |

<https://doi.org/10.1371/journal.pone.0283583.t001>





## Genomic synteny analysis

Progressive Mauve alignment was used to generate the ordered synteny (Mauve) between the local genomes and reference genomes of *K. pneumoniae* (NTUH-K2044) and *K. quasipneumoniae* (KqPF26), respectively. Generally, the genomic synteny of the *Klebsiella* species displayed many local collinear blocks (LCBs). It appeared that the local *K. pneumoniae* genome has smaller LCBs or similar regions (Fig 2A) compared to *K. quasipneumoniae* (Fig 2B). The color and position of lines indicated that there are some regions of rearrangement in the local isolates. While the genome is in its draft form and smaller LCBs relating to smaller contigs are not usually significant, the haphazard localization of these in some genomes also indicated levels of genome rearrangement not shared with the reference.

## Pangenome analysis, COG, and KEGG functional annotation

The pangenome of the local *K. pneumoniae* isolates consisted of 8534 gene clusters compared to the local *K. quasipneumoniae* isolate that only had 5557 gene clusters. The pangenome was divided into core genes (>90% of the local genomes) and accessory genes (<50% of the local genomes). The core genes were attributed to 50.7% of the *K. pneumoniae* gene clusters and 80.6% of the *K. quasipneumoniae* gene clusters, while the accessory genes comprised up to 43% of the *K. pneumoniae* gene clusters and 10.4% of the *K. quasipneumoniae* gene clusters (Table 2). Overall, less than 10% of the genomes were unclassified.

The *Klebsiella* species core and accessory protein-coding genes were functionally categorized based on COG and KEGG criteria. Nineteen of the twenty-six COG functional categories (S1A Fig) and six KEGG Orthology categories (S1B Fig) were assigned to the gene clusters. COG functionally annotated most of the core and accessory gene clusters, with less than 1.5% of the core genes remaining unassigned. Eight assigned COG categories of the core genes of both *K. pneumoniae* and *K. quasipneumoniae* not only had a greater abundance of gene clusters than the accessory genes but overall, also accounted for a larger proportion of the gene clusters. Additionally, approximately 2300 and 2600 of the core gene clusters, and 463 and 837 of the accessory gene clusters of the *K. pneumoniae* and *K. quasipneumoniae* isolates,

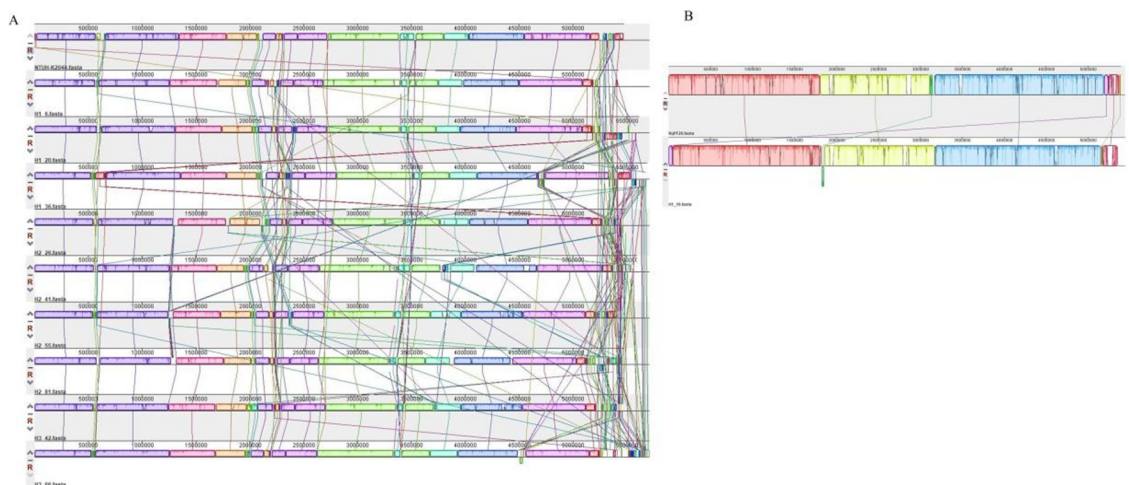

**Fig 2. Progressive mauve alignment of nine local *K. pneumoniae* genomes against the reference NTUH-K2044 (A) and a local *K. quasipneumoniae* genome against the reference KqPF26 (B).** Lines connecting identical colored modules represent the LCB among the genomes without rearrangements while the white areas within a block represent non-homologous regions. Incomplete/white blocks indicate that there was no alignment between the genomes.

<https://doi.org/10.1371/journal.pone.0283583.g002>



**Table 2. Pangenome analysis of clinical *K. pneumoniae* and *K. quasipneumoniae* isolates.**

| Species         | <i>K. pneumoniae</i> | <i>K. quasipneumoniae</i> |
|-----------------|----------------------|---------------------------|
| Pangenome       | 8534                 | 5557                      |
| Core genes      | 4323                 | 4478                      |
| Accessory genes | 3668                 | 578                       |
| Unclassified    | 543                  | 501                       |

<https://doi.org/10.1371/journal.pone.0283583.t002>

respectively, were assigned to KEGG pathways. It appeared that while COG inadequately linked defense mechanisms in the local *Klebsiella* species, KEGG assigned the local isolates to human disease pathways and was predicted to be more involved in infectious diseases (bacterial pathways).

### Mobilome analysis

MGEs were annotated using a combination of Prokka, RAST, and mobile element databases. MGEs in the form of plasmids and insertion sequences, or genes associated with phage-related proteins, integrases, transposases, Tn proteins, and resolvase, were distributed among the local isolates as seen in Fig 3. In general, a total of 880 MGEs were detected among the local isolates. The MGEs of the *K. pneumoniae* isolates were mostly located on chromosomes ( $n = 535$ ) rather than plasmids ( $n = 272$ ). The local *K. quasipneumoniae* isolate maintained an almost equal distribution of MGEs on chromosomes ( $n = 43$ ) and plasmids ( $n = 30$ ). IS elements represented the majority of MGEs which were distributed among 16 IS families in the local *Klebsiella* isolates (S2 Fig). Of the IS families predicted, the IS3 family had the most IS elements ( $n = 134$ ) which further consisted of 24 IS groups. Additionally, truncated fragments from thirteen different plasmids were identified with >95% similarity to reference *K. pneumoniae* and *K. quasipneumoniae* genomes (See S2 Table for plasmids predicted). Of these plasmids, the IncFIB(K) was the most common in the genomes, except H2\_55. Other commonly noted plasmids were IncFII(K) and IncR. Several intact phages including *Salmon Fels*, *Klebsi phiKO2*, *Klebsi ST15 OXA48phi14.1*, *Entero mEp237*, and *Escher 500465* were also predicted and had a 100% identity to reference *Enterobacteriaceae* strains (See S2 Table for phages predicted).

### Virulome analysis and secretion systems

The local strains displayed a myriad of virulence factors, some of which were unique to the UPKp (H1\_6, H1\_20, H2\_41, H2\_81, and H3\_42), and hvKp (H2\_55) isolates when compared to the cKp (H1\_36, H2\_26, and H3\_66) isolates and the classical *K. quasipneumoniae* (cKqp) (H1\_16) isolate (Fig 4). In addition to unique virulence features, the UPKp isolates harbored the uropathogenic specific protein, *usp*.

The genomes of the *K. pneumoniae* isolates were ordered against the complete reference genome NTUH-K2044 and the genome location of genes associated with virulence factors and secretions systems are highlighted in Fig 5A and 5B, respectively. The genes linked to virulence factors included those that contributed to adherence, antiphagocytosis, iron uptake, serum resistance, and regulation, and were within a similar region in the genomes, with the exception of the *iuc* cluster of genes and the CPS (K2 serotype) region in the local isolate H2\_55 (ring 6 in Fig 5A).

The Type 1 fimbriae (*fimA–fimK*) and the Type 3 fimbriae (*mrkABCD*) cluster of genes responsible for the adherence and biofilm formation of the *Klebsiella* species were detected in the *K. pneumoniae* and the *K. quasipneumoniae* isolates (See S3 Fig for general organization of

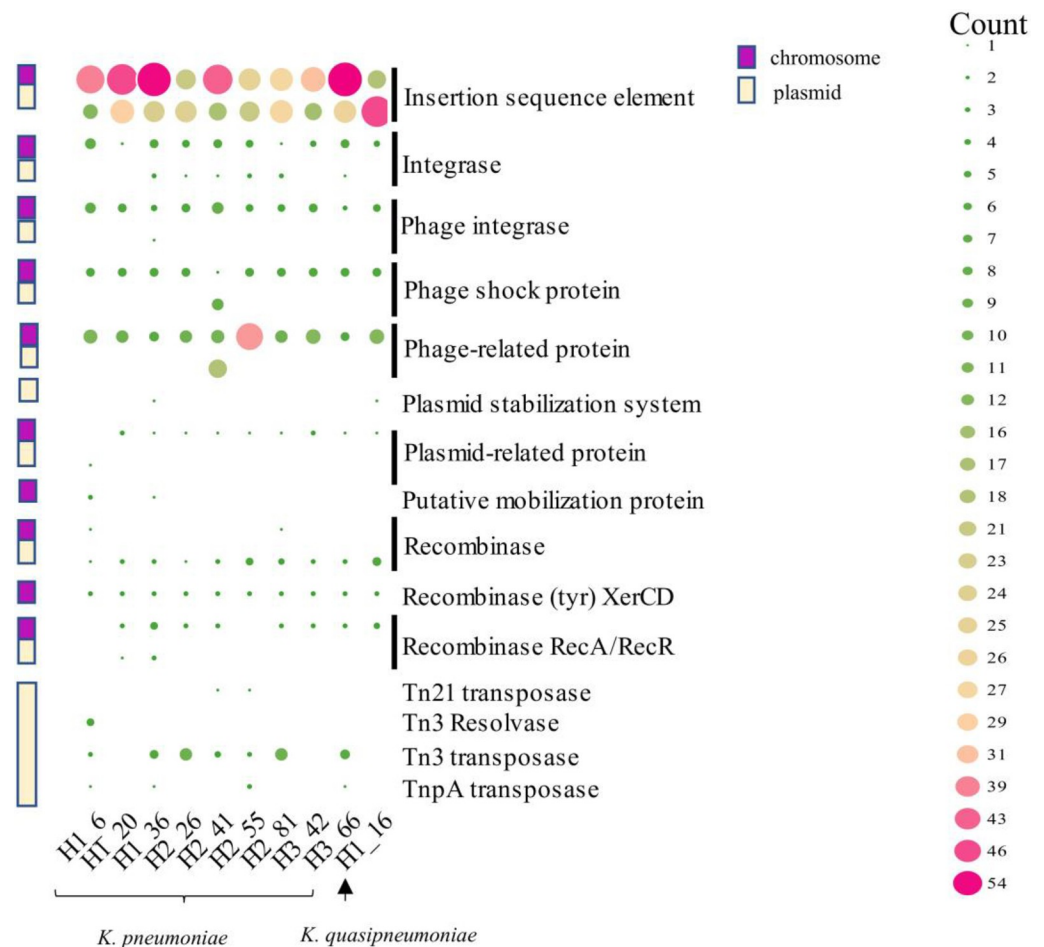

**Fig 3. Distribution of mobile elements on chromosomal and plasmid-derived contigs among local clinical *K. pneumoniae* and *K. quasipneumoniae* isolates.**

<https://doi.org/10.1371/journal.pone.0283583.g003>

genes). It is of note that IS elements and the *marR* transcriptional regulator were found upstream of the Type 1 fimbriae in the local isolates.

While it is common to observe the *Ent* siderophore system in *K. pneumoniae* genomes, genes from the other three siderophore systems were also detected in the local isolates (See [S3 Table](#) for genes associated with siderophores). An incomplete *iro* system was detected, with only the *iroE* and *iroN* being observed in the local isolates. Furthermore, the hvKp H2\_55 isolate was the only local *K. pneumoniae* with a complete *iuc* pathogenicity island of genes. Another outstanding observation was the prevalence of a complete *ybt* system in the local isolate H2\_41. Apart from adherence, biofilm formation, and iron exchange, other genes, and systems that are also associated with virulence including the *focA* (formate transport), *zapA* (cell division), *satP* (succinate acetate/proton symport), and the iron transport operon *feoABC* were also present in all the local isolates.

Additionally, genes that are responsible for the capsule synthesis (CPS locus) and serum resistance (*rfb* locus) prevailed in the local isolates and were predicted to putatively form genomic islands. It should be noted that all the isolates displayed varying CPS loci (See [S3 Table](#) for serotypes). Of interest, is H2\_55 which not only had the K2 CPS serotype, but also the O1/O2 Variant 1 *rfb* cluster ([S3 Fig](#)). Other *rfb* clusters including O1/O2 Variant 2, O3b, and O5, were

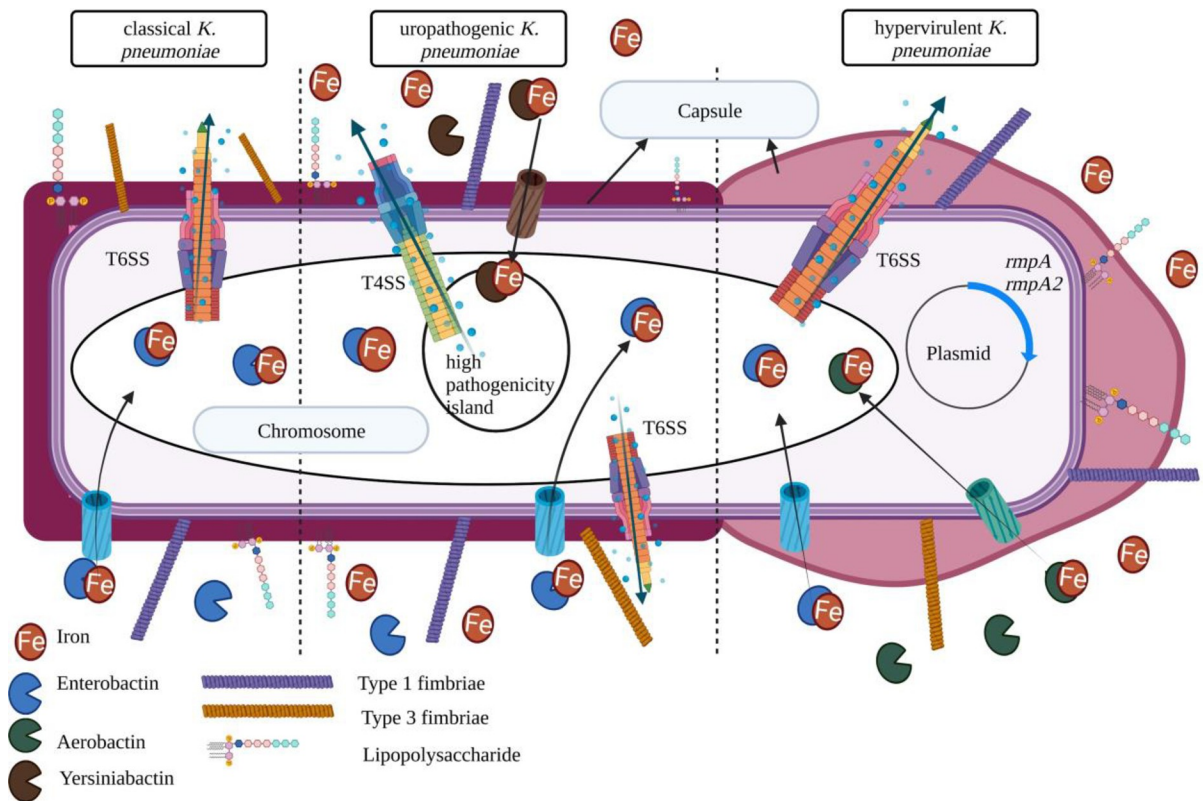

**Fig 4. Virulence factors associated with local cKp, UPKp, and hvKp.** The diagram was generated in BioRender.com.

<https://doi.org/10.1371/journal.pone.0283583.g004>

present in the local genomes, and the differences in the genes that manage these clusters are indicated in S3 Fig. It is noteworthy to mention that H2\_55 was the only isolate that had the regulation mucoid, *rmpA* and *rmpA2*, genes which were flanked by the MGE IS1N.

Secretion systems are another factor that promotes virulence and antibiotic resistance. The local isolates had genes for multiple secretion systems including T1SS, T2SS, T4SS, and the

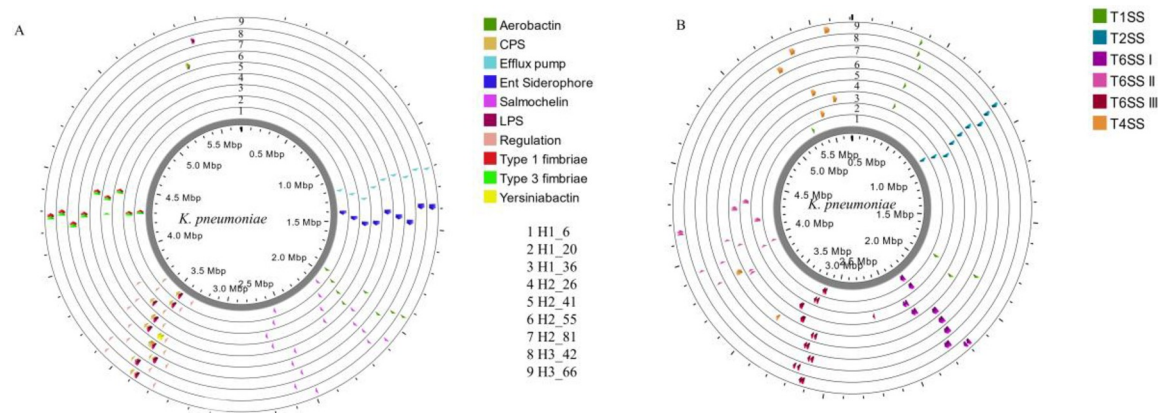

**Fig 5. Mapped coordinates of genes associated with virulence factors (A) and secretion systems (B) in local *K. pneumoniae* isolates.**

<https://doi.org/10.1371/journal.pone.0283583.g005>

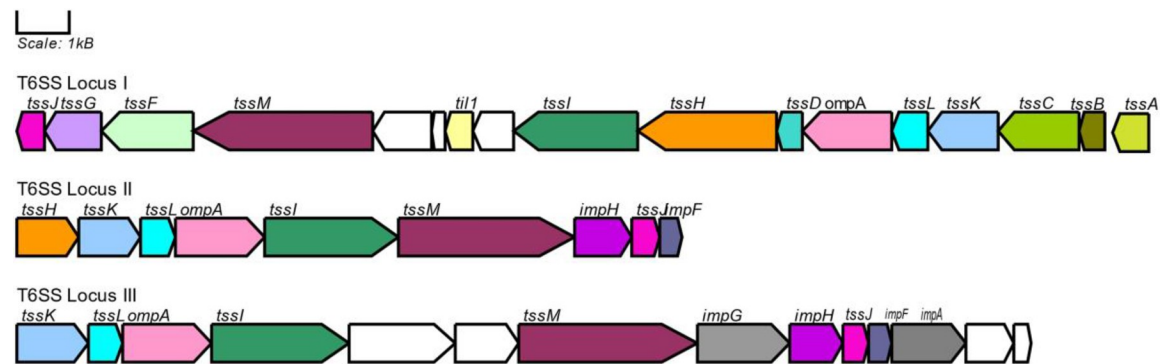

**Fig 6. Organization of the T6SS in local isolate H1\_36.**

<https://doi.org/10.1371/journal.pone.0283583.g006>

more recently described T6SS, which were observed to be located in similar regions of the genomes (Fig 5B). The two-partner passenger translocator (T5bSS) of the T5SS was noted in all the local isolates. Local isolates H1\_20, H2\_26, and H2\_55 had the complete cluster of genes responsible for the organization of the T1SS (S3 Table secretion system, rings 2, 4, and 6 in Fig 5B). The other local isolates had the *omf* gene further apart from the *abc* and *mfp* genes and can account for the differences in the location of the T1SS in the local isolates. The T4SS comprising the general secretion pathway proteins was noted in all the local isolates in relation to an IncF plasmid. In addition, local isolate H2\_41 also had the T4SS *virB* cluster of genes which was in close proximity to the IncQ plasmid. Genes from the 3 conserved loci of the T6SS were found in the *K. pneumoniae* isolates and their general organization in the local isolates is highlighted in Fig 6. The *tssB-M* genes that generate the core component of the T6SS were present in the isolates. The *vrgG*, *Hcp*, and *PAAR* effector components and putative effector (Table 3) and immunity (Table 4) proteins were also identified within the conserved loci as well as in other regions within the genome. It is also worth mentioning that while the PhoPQ pumps were present in all the genomes, the conserved T6SS regions of isolates H1\_6 and H1\_36 were flanked by these pumps.

Interestingly, isolate H2\_41 contained a genomic island (~52kb) that consisted of the T4SS *virB* cluster of genes and the high *ybt* pathogenicity island (~32kb) (Fig 7). The mobile element prophage integrase, *intA*, flanked the *ybt* pathogenicity island, and downstream of the T4SS were mobilization proteins, *MobB* and *MobC*, as well as transposase IS1222 from the IS3 family. It is worth noting that this genomic island was predicted to be present on a putative ICE, which when blasted against the ICEberg database was similar to *E. coli* *EDA1* and *K. pneumoniae* *HS11286*.

## Discussion

Genomic plasticity is a major factor in the spread of virulence and antibiotic resistance in *K. pneumoniae* [26]. While antibiotic resistance in *K. pneumoniae* is significantly important in clinical settings and the resistome of the local isolates is the focus of another ongoing study, virulence serves as an important factor that is used to enhance the invasiveness and persistence of infections [2]. We used WGS, a top Next-generation sequencing approach, to investigate the genomic content of nine clinical *K. pneumoniae* isolates and one clinical *K. quasipneumoniae* isolate obtained from patients at three major hospitals in Trinidad, West Indies. Several bioinformatic tools were used to investigate the virulome, mobilome, secretome, and phylogeny of each genome. We also used the assembled reads of the local genomes to validate the

Table 3. T6SS effector proteins detected in local clinical *K. pneumoniae* isolates.

| Isolate | Isolate orf | % Identity | Effector Protein | Effector Type | Referenced Literature (effector proteins and function) |
|---------|-------------|------------|------------------|---------------|--------------------------------------------------------|
| H2_41   | orf1805     | 92         | EFF01453         | Tse           | 54                                                     |
| H2_55   | orf1870     | 96         |                  |               |                                                        |
| H2_81   | orf5027     | 92         |                  |               |                                                        |
| H1_36   | orf1887     | 80         |                  |               |                                                        |
| H2_26   | orf3500     | 90         | EFF01467         | Tde           | 55                                                     |
| H2_26   | orf3049     | 81         | EFF01826         | Tse           | 56                                                     |
| H1_6    | orf2962     | 80         |                  |               |                                                        |
| H1_36   | orf3071     | 80         |                  |               |                                                        |
| H2_41   | orf2953     | 80         |                  |               |                                                        |
| H2_55   | orf2950     | 80         |                  |               |                                                        |
| H3_66   | orf2875     | 80         |                  |               |                                                        |
| H1_20   | orf2057     | 100        | EFF18621         | Tle           | 57                                                     |
| H2_26   | orf2185     | 96         | EFF00560         | -             | 58                                                     |
| H2_26   | Orf3521     | 94         |                  |               |                                                        |
| H1_6    | orf2114     | 96         |                  |               |                                                        |
| H1_20   | orf2050     | 96         |                  |               |                                                        |
| H1_36   | orf2175     | 96         |                  |               |                                                        |
| H2_41   | orf2060     | 96         |                  |               |                                                        |
| H3_42   | orf2092     | 96         |                  |               |                                                        |
| H3_66   | orf1979     | 96         |                  |               |                                                        |

The data in this table was generated using SecRet6 (<http://db-mmml.sjtu.edu.cn/SecReT6/>) T6SS prediction tool, with an 80% blast identity threshold value. The '-' indicates that the effector type is uncharacterized.

<https://doi.org/10.1371/journal.pone.0283583.t003>

species identity of the isolates via the presence of the seven housekeeping genes. The nine *K. pneumoniae* isolates were confirmed as previously predicted [32], while the isolate that was inaccurately characterized as *K. pneumoniae* using clinical laboratory methods was identified as *K. quasipneumoniae*. This finding is similar to another study where clinical isolates identified as *K. pneumoniae* in diagnostic microbiology laboratories were later determined to belong to *K. quasipneumoniae* [54]. This was not surprising since accurate identification of members of the *Klebsiella* species can be challenging for most hospital laboratories since members of this genus, especially *K. pneumoniae*, *K. quasipneumoniae*, and even *K. variicola* share similar colony morphology and biochemical properties [55]. However, the findings of this study demonstrate the need to implement molecular techniques targeting specific housekeeping genes to properly identify *Klebsiella* species at the local hospital laboratories. Although the main focus of this study was on clinical *K. pneumoniae*, the *K. quasipneumoniae* isolate was also included in downstream analysis due to the growing concern for this species in the clinical world [56].

The size and the GC% of the local *K. pneumoniae* and the *K. quasipneumoniae* genomes were similar to reference strains. Several local isolates were classified into ST groups that contain international high-risk clones including ST11, ST15, and ST307 associated with major epidemics [57]. In order to get a better insight into the diversity of the local isolates, we performed wgSNP analysis with references to similar STs including isolates from a recent Caribbean study [31], the United Kingdom, Taiwan, and Ireland [58]. The data revealed that there is a wide assortment of isolates present in Trinidad, some of which clustered with global and Caribbean references. Despite the fact that this country took part in the Pilot Caribbean study [31], it is not possible to say whether the isolates from this current study are closely



Table 4. T6SS immunity proteins detected in local clinical *K. pneumoniae* isolates.

| Isolate | Isolate orf | % Identity | Immunity Protein | Cognate Effector | Referenced Literature (immunity proteins and functions) |
|---------|-------------|------------|------------------|------------------|---------------------------------------------------------|
| H1_6    | orf4535     | 93         | IMU00344         | EFF01520         | 59                                                      |
| H1_20   | orf4481     | 93         |                  |                  |                                                         |
| H1_36   | orf4729     | 93         |                  |                  |                                                         |
| H2_55   | orf4554     | 93         |                  |                  |                                                         |
| H2_81   | orf4464     | 93         |                  |                  |                                                         |
| H3_42   | orf4526     | 93         |                  |                  |                                                         |
| H3_66   | orf4535     | 93         |                  |                  |                                                         |
| H2_26   | orf2191     | 97         | IMU17297         | EFF18621         | 57                                                      |
| H1_20   | orf2055     | 95         |                  |                  |                                                         |
| H2_41   | orf2064     | 100        |                  |                  |                                                         |
| H2_41   | orf2067     | 96         |                  |                  |                                                         |
| H2_55   | orf2053     | 97         |                  |                  |                                                         |
| H2_81   | orf2069     | 95         |                  |                  |                                                         |
| H2_26   | orf2195     | 98         | IMU17298         |                  |                                                         |
| H1_20   | orf2056     | 91         |                  |                  |                                                         |
| H2_41   | orf2065     | 100        |                  |                  |                                                         |
| H2_55   | orf2054     | 90         |                  |                  |                                                         |
| H2_26   | orf2194     | 99         | IMU17299         |                  |                                                         |
| H1_20   | orf2054     | 96         |                  |                  |                                                         |
| H2_41   | orf2066     | 100        |                  |                  |                                                         |
| H2_81   | orf2068     | 96         |                  |                  |                                                         |
| H3_42   | orf2098     | 100        |                  |                  |                                                         |
| H3_42   | orf2099     | 92         |                  |                  |                                                         |
| H2_26   | orf2190     | 94         | IMU17300         |                  |                                                         |
| H2_26   | orf2196     | 94         |                  |                  |                                                         |
| H1_20   | orf5223     | 99         |                  |                  |                                                         |
| H1_20   | orf5226     | 92         |                  |                  |                                                         |
| H2_41   | orf2068     | 100        |                  |                  |                                                         |
| H2_55   | orf2052     | 94         |                  |                  |                                                         |
| H2_81   | orf2070     | 94         |                  |                  |                                                         |
| H3_42   | orf2097     | 99         |                  |                  |                                                         |

The data in this table was generated using SecRet6 (<http://db-mml.sjtu.edu.cn/SecReT6/>) T6SS prediction tool, with an 80% blast identity threshold value. The '-' indicates that the effector type is uncharacterized.

<https://doi.org/10.1371/journal.pone.0283583.t004>

related to reference Caribbean isolates originating in Trinidad. Nonetheless, we suggest the possibility of the presence of transmission networks and therefore, emphasize the importance of identifying putative reservoirs of *K. pneumoniae* that may be involved in the transmission of this pathogen between hospitals within this country and eventually the ability to encourage global dissemination. While some of the local isolates, for instance, cKp H1\_36, UPKp H1\_6, and hvKp H2\_55, clustered in clades with references, it is crucial to note that these isolates

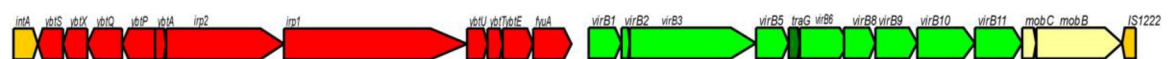

Fig 7. Genomic island displaying the high *ybt* pathogenicity island and T4SS in the local clinical *K. pneumoniae* isolate H2\_41.

<https://doi.org/10.1371/journal.pone.0283583.g007>

were not identical to any reference isolates, which highlights the diversity of *K. pneumoniae* isolates in this country.

Although the majority of the local isolates were attributed to unique STs, wgSNP groupings appear to be linked to acquired metabolic functions based on COG and KEGG analysis as many isolates shared a large core genome and thus indicated the genomic plasticity that is contained within this genus. MGEs are essential in the transmission of virulence genes within and between species. The virulence genes and secretion systems were inserted between or on MGEs. IS elements dominated in the local isolates and although they are the simplest mobile elements found in bacterial pathogens they are critical in the dissemination of virulence and resistance genes via horizontal gene transfer. It was not unexpected that we observed members of the IS3 family flanking the virulence genes in the local genomes since these IS elements are commonly reported in virulent *K. pneumoniae* [59, 60]. Additionally, similar to other published reports, this study also noted the prevalence of *Klebsi phiKO2* and *klebsi ST15 OXA48-phi14.1* phages in the local genomes [24, 61] which was not unexpected since they constitute a major player in the virulence and evolution of important pathogenic bacteria [62].

Virulence factors play an essential role in determining the severity of infection caused by *K. pneumoniae* and, hence, are often used to characterize strains of this pathogen. Based on our initial study [32] virulence genes were prevalent in the local isolates according to PCR. However, WGS of selected isolates allowed us to perform a more in-depth analysis utilizing bioinformatics tools to investigate the virulome of the isolates to putatively determine the pathogenicity of the local isolates and hence their potential effect in clinical settings of this country. While the ten isolates had potential virulence factors, local hvKp and UPKp isolates stood out for carrying unique features that may have the ability to encourage severe infections.

Similar to another study, the local isolates' Type 1 and Type 3 fimbriae were homologous to the conserved gene cluster *fim-pecS-pecM-mrk* [63]. The Type 1 fimbriae are critical in initiating the adhesion process of the bacteria to the host, and while it is necessary if cKp and cKqp isolates were to contribute to virulence, it has been hypothesized to enhance virulence in UPKp [64]. The Type 3 fimbriae are critical for biofilm formation of uropathogenic strains, as well as nosocomial strains, and are functionally expressed once the 6 *mrk* genes are observed [65] as was seen in the local isolates. Although the *pecS* and *pecM* proteins are members of the *MarR* transcriptional regulators of virulence genes, and it is common that the Type 1 and Type 3 fimbriae are found within the conserved pathway that includes the *MarR* proteins, it has been shown that these proteins are often dispensable in lung infections caused by *K. pneumoniae* [66]. It is also noteworthy that the fimbriae conserved pathway was flanked by the ISEcp1 transposase in the local isolates, which therefore suggests the potential mobility of these virulence factors. Apart from the fimbriae, the local isolates also carried iron scavenging systems which are imperative for the uptake of iron during limiting conditions. Furthermore, the presence of the *feoABC* transporters in the local isolates suggests that iron homeostasis is maintained in these pathogens [67] and therefore increases their chances of survival in limiting conditions.

We also observed biomarkers of significant importance that can putatively influence infections due to *K. pneumoniae* in the local hvKp isolate. In particular, the *iucABCD* cluster of genes that forms the *iuc* siderophore system was unique to the hvKp isolate. Although the hvKp can produce the four siderophores, the *iuc* system accounts for more than 90% of siderophore production and is critical for growth/survival ex vivo and for extreme virulence in vivo [68]. Additionally, this isolate also had the K2 and the O1/O2 Variant 2 serotypes. Apart from these serotypes dominating invasive human infections, they have also been observed in ST86 virulent isolates from a Pilot study in the Caribbean [24, 69]. Also, it was not unexpected that the local hvKp isolate had the *rmpA* gene that is responsible for K2 synthesis since this gene is

particularly linked to hvKp strains and is often involved in invasive purulent diseases and liver abscesses [24, 70]. While the hypervirulent isolate from this study was obtained from a patient who was warded at the National Organ Transplant Unit in the country, and it was not surprising that the traits of hypervirulence were observed, the corroborating data on the specimen at the time of collection did not specify links to any specific disease. However, based on the basic background information on the host of this isolate [32] and the prevalence of several hvKp biomarkers in its virulome, we can speculate that this isolate may have been linked to invasive disease.

On the other hand, while the local UPKp isolates had traits that were typical of uropathogenic strains including features such as *fimH*, *mrkD*, *iutA*, *feoA/B/C*, *foc*, O1/O2 Variant 2 and O3b O serotypes, and the *usp* protein, H2\_41 stood out due to the prevalence of the *ybt* high pathogenicity island. This island was putatively present within an ICE genomic island that also consisted of the T4SS *virB* conjugative machinery. The ICE was predicted based on a minimal blast % ID of 90 and showed similarities to *E. coli* *EDA1* and *K. pneumoniae* HS11286 among others from the ICEberg dataset. The *ybt* island displayed typical features of a pathogenicity island including (i) a gene cluster size ~32kb, (ii) location next to a tRNA encoding gene (tRNA-Asn-GTT), and (iii) the presence of a gene coding for integrase (*intA*) [71]. This pathogenicity island is commonly found in uropathogenic organisms and incorporates many functions apart from siderophore production and enhancement of bacterial growth. In fact, the *ybt* system also avoids inflammatory responses and the outer membrane receptor *fyuA* contributes to efficient biofilm formation in urine [72, 73]. While we did not obtain clinical data at the time of collection of the cultured isolates, we can postulate that based on this unique trait, this isolate can influence virulence and putatively prolong UTI infection in their host.

Additionally, it was expected that secretion systems were noted in the local isolates since pathogenic *K. pneumoniae* use these systems to secrete virulence factors/proteins that can invade the host cell and in turn promote the growth and survival of the pathogen in the host. While the T1SS and T2SS in the local isolates appeared to be involved in the secretions of important proteins such as RTX (Repeats-In-Toxin) cytolysin protein, and pullulanase, the T4SS was responsible for the conjugation and mediating horizontal gene transfer which can contribute to genome plasticity and the basic evolution of infectious pathogens through the dissemination of virulence genes. It is also important to mention that the T6SS, which is considered a versatile weapon used to attack bacterial and fungal competitors and manipulate host cells was observed in the local *K. pneumoniae* isolates. The T6SS has become a part of the *K. pneumoniae* core genome and is crucial in interspecies and intraspecies competition [74]. This system is especially critical to hvKp and UPKp in transporting proteins, invasion of cells, and most importantly outcompeting other pathogenic species. The local isolates had 12 conserved genes *tss* (B-M) which encode the proteins that make up the basic secretion apparatus of a functional T6SS system [75], including the Hcp-VgrG-PAAR structure that transports effector proteins. Herein, the effector proteins noted were similar to those from previously experimentally investigated studies [74, 76–78] and have been noted as playing a role in fungal and bacterial competition. The Tle1<sup>KP</sup> effector protein from the local isolate was not only 100% identical to the *K. pneumoniae* HS11286 strain from which this protein was first detected, but also as expected comprised the G-X-S-X-G motif which belongs to the Tle family. The Tle1<sup>KP</sup> effector protein has been reported to be involved in periplasmic activity as well as cause growth retardation in neighbouring *E. coli* competitors [77], and therefore we can assume that the local isolate may have similar capabilities. We also observed the Tse (EFF01826) effector protein which has been experimentally proven to inhibit the growth of yeast and is therefore directly involved in fungal competition [74, 79]. It is also worth noting that the local isolates had immunity proteins and in turn can protect themselves from lysis/ self-death [74, 80].

Virulence and resistance are the two driving mechanisms that can determine the persistence of infections caused by *K. pneumoniae* and more recently, *K. quasipneumoniae*. While this study explored the analysis of the virulome and its accompanying mobilome and secretome, resistome analysis is also critical to fully determine the local isolates' potential from the epidemiological perspective. The unique traits associated with the local hvKp and UPKp isolates aided us in linking these traits to potentially important clinical characteristics. These findings represent features that are now unique to the *K. pneumoniae* isolates in Trinidad and thus can be targeted for future surveillance, virulence, and pathogenicity studies in this country as well as in the Caribbean region. While WGS may be prohibitively expensive for hospital laboratories, molecular characterization to determine the prevalence of these traits using PCR of marker genes may be useful to medical practitioners for diagnosis and treating infections caused by *K. pneumoniae* and *K. quasipneumoniae*.

## Conclusion

*K. pneumoniae* is a globally recognized pathogen that can cause severe infections and mortality. The heterogeneity of *K. pneumoniae* strains and the potential to disseminate resistant and virulent traits that can promote outbreaks make this pathogen critical in the clinical world. In order to prevent mishaps by this pathogen, it is important to understand the characteristic features associated with such isolates locally. Currently, there is a lack of detailed information on the genomes of clinical Trinidadian *K. pneumoniae* isolates. This is the first comprehensive study that investigated the virulome, secretome, and associated mobilome of clinical *K. pneumoniae* and *K. quasipneumoniae* in Trinidad, West Indies. The data from this study showed that there is a blend of isolates in this country that carried several biomarkers such as adhesion, pili formation, stress tolerance, iron scavenging, CPS, and LPS serotypes that are pathogenically important. While some of the Trinidadian isolates were highly similar to Caribbean and international references, others appeared to be more diverse. More importantly, the local isolates have been shown to be similar to high-risk clones that have caused severe outbreaks internationally. Many different MGEs were positioned around or within the large virulome of the local isolates, thereby suggesting the ease at which dissemination can occur via horizontal gene transfer. Although the data presented in this study suggest that strict infection control measures should be implemented in the health care system, it can also guide medical practitioners during diagnosis and the treatment of infections caused by *K. pneumoniae*. The data can also be useful for future genomic studies, especially those focused on investigating the diversity and virulence of isolates in this country.

## Supporting information

**S1 Table. Origin of local isolates, reference strains, and SNP matrix.**  
(XLSX)

**S2 Table. Plasmids and phage predicted.**  
(XLSX)

**S3 Table. Genes associated with siderophores, serotypes, and secretion systems.**  
(XLSX)

**S1 Fig. COG (A) and KEGG (B) functional annotation of local *K. pneumoniae* and *K. quasipneumoniae* pangenome elements.**  
(DOCX)

**S2 Fig. Distribution of insertion sequence elements among local clinical *K. pneumoniae* and *K. quasipneumoniae* isolates.**

(DOCX)

**S3 Fig. Gene organization of virulence factors in local clinical *K. pneumoniae* and *K. quasipneumoniae* isolates.**

(DOCX)

## Acknowledgments

We thank Mr. Stephen D. B. Jr Ramnarine (University of the West Indies, St. Augustine, Trinidad and Tobago) for his extensive review of the manuscript.

## Author Contributions

**Conceptualization:** Aarti Pustam, Jayaraj Jayaraman, Adesh Ramsubhag.

**Data curation:** Aarti Pustam.

**Formal analysis:** Aarti Pustam.

**Methodology:** Aarti Pustam, Jayaraj Jayaraman, Adesh Ramsubhag.

**Project administration:** Jayaraj Jayaraman, Adesh Ramsubhag.

**Resources:** Jayaraj Jayaraman.

**Supervision:** Jayaraj Jayaraman, Adesh Ramsubhag.

**Writing – original draft:** Aarti Pustam.

**Writing – review & editing:** Jayaraj Jayaraman, Adesh Ramsubhag.

## References

1. Russo TA, Marr CM. Hypervirulent *Klebsiella pneumoniae*. Clin Microbiol Rev. 2019; 32(3):e00001–19.
2. Beceiro A, Tomás M, Bou G. Antimicrobial resistance and virulence: A successful or deleterious association in the bacterial world? Clin Microbiol Rev. 2013; 26(2):185–230. <https://doi.org/10.1128/CMR.00059-12> PMID: 23554414
3. Fang C-T, Chuang Y-P, Shun C-T, Chang S-C, Wang J-T. A Novel Virulence Gene in *Klebsiella pneumoniae* Strains Causing Primary Liver Abscess and Septic Metastatic Complications. J Exp Med. 2004; 199(5):697–705
4. Liu YC, Cheng DL, Lin CL. *Klebsiella pneumoniae* liver abscess associated with septic endophthalmitis. Arch Intern Med. 1986; 146(10):1913–6.
5. Shon AS, Bajwa RPS, Russo TA. Hypervirulent (hypermucoviscous) *Klebsiella Pneumoniae*: A new and dangerous breed. Virulence. 2013; 4(2):107–18.
6. Fazili T, Sharngoe C, Endy T, Kiska D, Javaid W, Polhemus M. *Klebsiella pneumoniae* Liver Abscess: An Emerging Disease. Am J Med Sci [Internet]. 2016; 351(3):297–304. Available from: <https://doi.org/10.1016/j.amjms.2015.12.018> PMID: 26992260
7. Russo TA, Olson R, Fang C- T, Stoesser N, Miller M, MacDonald Ulrike Hutson A, et al. Identification of Biomarkers for Differentiation of Hypervirulent *Klebsiella pneumoniae* from Classical *K. pneumoniae*. J Clin Microbiol. 2018; 56(9):e00776–18.
8. Tan TY, Cheng Y, Ong M, Ng LS. Performance characteristics and clinical predictive value of the string test for detection of hepato-virulent *Klebsiella pneumoniae* isolated from blood cultures. Diagn Microbiol Infect Dis. 2014; 78(2):127–8.
9. Catalán-Nájera JC, Garza-Ramos U, Barrios-Camacho H. Hypervirulence and hypermucoviscosity: Two different but complementary *Klebsiella* spp. phenotypes? Virulence [Internet]. 2017; 8(7):1111–23. Available from: <https://doi.org/10.1080/21505594.2017.1317412> PMID: 28402698
10. Foxman B. The epidemiology of urinary tract infection. Nat Rev Urol [Internet]. 2010; 7:653–660. Available from: <https://doi.org/10.1038/nrurol.2010.190> PMID: 21139641



11. Paczosa MK, Mecsas J. *Klebsiella pneumoniae*: Going on the Offense with a Strong Defense. Microbiol Mol Biol Rev. 2016; 80(3): 629–650.
12. Holden VI, Breen P, Houle S, Dozois Charles M, Bachmana MA. *Klebsiella pneumoniae* Siderophores Induce Inflammation, Bacterial Dissemination, and HIF-1 Stabilization during Pneumonia. MBio [Internet]. 2016; 7(5):e01397–16. Available from: <https://doi.org/10.1128/mBio.01397-16> PMID: 27624128
13. Koczura Ryszard Kaznowski A. Occurrence of the Yersinia high-pathogenicity island and iron uptake systems in clinical isolates of *Klebsiella pneumoniae*. Microb Pathog [Internet]. 2003; 33(5):197–202. Available from: [https://doi.org/10.1016/S0882-4010\(03\)00125-6](https://doi.org/10.1016/S0882-4010(03)00125-6) PMID: 14521878
14. Shankar-Sinha S, Valencia GA, Janes BK, Rosenberg JK, Whitfield C, Bender RA, et al. The *Klebsiella pneumoniae* O Antigen Contributes to Bacteremia and Lethality during Murine Pneumonia. Infect Immun. 2004; 72(3):1423–30.
15. Flores-Valdez M, Ares MA, Rosales-Reyes R, Torres J, Girón JA, Weimer BC, et al. Whole Genome Sequencing of Pediatric *Klebsiella pneumoniae* Strains Reveals Important Insights Into Their Virulence-Associated Traits. Front Microbiol. 2021; 12(August):1–13.
16. Pan YJ, Fang HC, Yang HC, Lin TL, Hsieh PF, Tsai FC, et al. Capsular polysaccharide synthesis regions in *Klebsiella pneumoniae* serotype K57 and a new capsular serotype. J Clin Microbiol. 2008; 46(7):2231–40.
17. Choi M, Hegerle N, Nkeze J, Sen S, Jamindar S, Nasrin S, et al. The Diversity of Lipopolysaccharide (O) and Capsular Polysaccharide (K) Antigens of Invasive *Klebsiella pneumoniae* in a Multi-Country Collection. Front Microbiol. 2020; 11(June).
18. Yu WL, Ko WC, Cheng KC, Lee HC, Ke DS, Lee CC, et al. Association between *ompA* and *magA* genes and clinical syndromes caused by *Klebsiella pneumoniae* in Taiwan. Clin Infect Dis. 2006; 42(10):1351–8.
19. Lery LMS, Frangeul L, Tomas A, Passet V, Almeida AS, Bialek-Davenet S, et al. Comparative analysis of *Klebsiella pneumoniae* genomes identifies a phospholipase D family protein as a novel virulence factor. BMC Biol. 2014; 12:15–8.
20. Barbosa VAA, Lery LMS. Insights into *Klebsiella pneumoniae* type VI secretion system transcriptional regulation. BMC Genomics [Internet]. 2019; 20(1):506. Available from: <https://doi.org/10.1186/s12864-019-5885-9> PMID: 31215404
21. Wallden K, Rivera-Calzada A, Waksman G. Type IV secretion systems: Versatility and diversity in function. Cell Microbiol. 2010; 12(9):1203–12. <https://doi.org/10.1111/j.1462-5822.2010.01499.x> PMID: 20642798
22. Nivaskumar M, Francetic O. Type II secretion system: A magic beanstalk or a protein escalator. Biochim Biophys Acta—Mol Cell Res [Internet]. 2014; 1843(8):1568–77. Available from: <https://doi.org/10.1016/j.bbamcr.2013.12.020> PMID: 24389250
23. Russell AB, Peterson SB, Mougous JD. Type VI secretion system effectors: Poisons with a purpose. Nat Rev Microbiol. 2014; 12(2):137–48. <https://doi.org/10.1038/nrmicro3185> PMID: 24384601
24. Enany S, Zakeer S, Diab AA, Bakry U, Sayed AA. Whole genome sequencing of *Klebsiella pneumoniae* clinical isolates sequence type 627 isolated from Egyptian patients. PLoS One [Internet]. 2022; 17(3 March):1–14. Available from: <https://doi.org/10.1371/journal.pone.0265884> PMID: 35320327
25. Rafiq Z, Sam N, Vaidyanathan R. Whole genome sequence of *Klebsiella pneumoniae* U25, a hypermucoviscous, multidrug resistant, biofilm producing isolate from India. Mem Inst Oswaldo Cruz. 2016; 111(2):144–6.
26. Kumar V, Sun P, Vamathevan J, Li Y, Ingraham K, Palmer L, et al. Comparative genomics of *Klebsiella pneumoniae* strains with different antibiotic resistance profiles. Antimicrob Agents Chemother. 2011; 55(9):4267–76.
27. Ochman H, Lawrence J, Groisman E. Lateral gene transfer and the nature of bacterial innovation. Nature. 2000; 405:299–304. <https://doi.org/10.1038/35012500> PMID: 10830951
28. Enright MC, Spratt BG. Multilocus sequence typing. Trends Microbiol [Internet]. 1999; 7(12). Available from: [https://doi.org/10.1016/S0966-842X\(99\)01609-1](https://doi.org/10.1016/S0966-842X(99)01609-1) PMID: 10603483
29. Zhou K, Lokate M, Deurenberg RH, Tepper M, Arends JP, Raangs EGC, et al. Use of whole-genome sequencing to trace, control and characterize the regional expansion of extended-spectrum  $\beta$ -lactamase producing ST15 *Klebsiella pneumoniae*. Sci Rep [Internet]. 2016; 6(January):1–10. Available from: <https://doi.org/10.1038/srep20840> PMID: 26864946
30. Jia H, Zhang Y, Ye J, Xu W, Xu Y, Zeng W, et al. Outbreak of multidrug-resistant oxa-232-producing st15 *Klebsiella pneumoniae* in a teaching hospital in Wenzhou, China. Infect Drug Resist. 2021; 14(October):4395–407.

31. Heinz E, Brindle R, Morgan-McCalla A, Peters K T N. Caribbean multi-centre study of *Klebsiella pneumoniae*: whole-genome sequencing, antimicrobial resistance and virulence factors. *Microb Genom*. 2019; 5(5):e000266.
32. Pustam A, Jayaraman J, Ramsubhag A. Characterization of Beta-Lactam Resistance Genes and Virulence Factors Associated with Multidrug-Resistant *Klebsiella pneumoniae* Isolated from Patients at Major Hospitals in Trinidad, West Indies. *Curr Microbiol*. 2022; 79(278).
33. Tayebbeh F, Amani J, Nazarian S, Moradyar M, Mirhosseini SA. Molecular diagnosis of clinically isolated *Klebsiella pneumoniae* strains by PCR-ELISA. *J Appl Biotechnol Reports*. 2016; 3(4):501–5.
34. Afgan E, Baker D, Batut B, Van Den Beek M, Bouvier D, Ech M, et al. The Galaxy platform for accessible, reproducible and collaborative biomedical analyses: 2018 update. *Nucleic Acids Res*. 2018; 46(W1):W537–44. <https://doi.org/10.1093/nar/gky379> PMID: 29790989
35. Gurevich A, Saveliev V, Vyahhi N, Tesler G. QUAST: Quality assessment tool for genome assemblies. *Bioinformatics*. 2013; 29(8):1072–5. <https://doi.org/10.1093/bioinformatics/btt086> PMID: 23422339
36. Overbeek R, Olson R, Pusch GD, Olsen GJ, Davis JJ, Disz T, et al. The SEED and the Rapid Annotation of microbial genomes using Subsystems Technology (RAST). *Nucleic Acids Res*. 2014; 42(D1):206–14. <https://doi.org/10.1093/nar/gkt1226> PMID: 24293654
37. Rodríguez-R LM, Gunturu S, Harvey WT, Rosselló-Mora R, Tiedje JM, Cole JR, et al. The Microbial Genomes Atlas (MiGA) webserver: Taxonomic and gene diversity analysis of Archaea and Bacteria at the whole genome level. *Nucleic Acids Res*. 2018; 46(W1):W282–8. <https://doi.org/10.1093/nar/gky467> PMID: 29905870
38. Lam MMC, Wick RR, Watts SC, Cerdeira LT, Wyres KL, Holt KE. A genomic surveillance framework and genotyping tool for *Klebsiella pneumoniae* and its related species complex. *Nat Commun [Internet]*. 2021; 12(1). Available from: <https://doi.org/10.1038/s41467-021-24448-3> PMID: 34234121
39. Larsen M V., Cosentino S, Rasmussen S, Friis C, Hasman H, Marvig RL, et al. Multilocus sequence typing of total-genome-sequenced bacteria. *J Clin Microbiol*. 2012; 50(4):1355–61. <https://doi.org/10.1128/JCM.06094-11> PMID: 22238442
40. Kaas RS, Leekitcharoenphon P, Aarestrup FM, Lund O. Solving the problem of comparing whole bacterial genomes across different sequencing platforms. *PLoS One*. 2014; 9(8):1–8. <https://doi.org/10.1371/journal.pone.0104984> PMID: 25110940
41. Darling AE, Mau B, Perna NT. Progressivemauve: Multiple genome alignment with gene gain, loss and rearrangement. *PLoS One*. 2010; 5(6). <https://doi.org/10.1371/journal.pone.0011147> PMID: 20593022
42. Huerta-Cepas J, Szklarczyk D, Heller D, Hernández-Plaza A, Forslund SK, Cook H, et al. EggNOG 5.0: A hierarchical, functionally and phylogenetically annotated orthology resource based on 5090 organisms and 2502 viruses. *Nucleic Acids Res*. 2019; 47(D1):D309–14. <https://doi.org/10.1093/nar/gky1085> PMID: 30418610
43. Siguier P, Perochon J, Lestrade L, Mahillon J, Chandler M. ISfinder: the reference centre for bacterial insertion sequences. *Nucleic Acids Res*. 2006; 34(Database issue):32–6. <https://doi.org/10.1093/nar/gkj014> PMID: 16381877
44. Liu M, Li X, Xie Y, Bi D, Sun J, Li J, et al. ICEberg 2.0: An updated database of bacterial integrative and conjugative elements. *Nucleic Acids Res*. 2019; 47(D1):D660–5. <https://doi.org/10.1093/nar/gky1123> PMID: 30407568
45. Antipov D, Raiko M, Lapidus A, Pevzner PA. Plasmid detection and assembly in genomic and metagenomic data sets. *Genome Res*. 2019; 29(6):961–8. <https://doi.org/10.1101/gr.241299.118> PMID: 31048319
46. Carattoli A, Zankari E, García-Fernández A, Voldby LM, Lund O, Villa L, et al. In silico detection and typing of plasmids using PlasmidFinder and plasmid multilocus sequence typing. *Antimicrobial agents and chemotherapy*. 2014; 58(7), 3895–3903. <https://doi.org/10.1128/AAC.02412-14> PMID: 24777092
47. Arndt D, Grant JR, Marcu A, Sajed T, Pon A, Liang Y, et al. PHASTER: a better, faster version of the PHAST phage search tool. *Nucleic Acids Res*. 2016; 44(W1):W16–21. <https://doi.org/10.1093/nar/gkw387> PMID: 27141966
48. Wick RR, Heinz E, Holt KE, Wyres KL. Kaptive web: User-Friendly capsule and lipopolysaccharide serotype prediction for *Klebsiella* genomes. *J Clin Microbiol*. 2018; 56(6).
49. Zhang Y, Zhang Y, Xiong Y, Wang H, Deng Z, Song J, et al. T4SEfinder: a bioinformatics tool for genome-scale prediction of bacterial type IV secreted effectors using pre-trained protein language model. *Brief Bioinform*. 2022; 23(1). <https://doi.org/10.1093/bib/bbab420> PMID: 34657153
50. Li J, Yao Y, Xu HH, Hao L, Deng Z, Rajakumar K, et al. SecReT6: a web-based resource for type VI secretion systems found in bacteria. *Environ Microbiol*. 2015; 17(7):2196–2202. <https://doi.org/10.1111/1462-2920.12794> PMID: 25640659

51. Grant JR, Stothard P. The CGView Server: a comparative genomics tool for circular genomes. *Nucleic Acids Res.* 2008; 36(Web Server issue):181–4.
52. Chen C, Chen H, Zhang Y, Thomas HR, Frank MH, He Y, et al. TBtools, a Toolkit for Biologists integrating various biological data handling tools with a user-friendly interface. *Mol Plant.* 2020; 13(8):P1194–1202.
53. Harrison KJ, De Crécy-Lagard V, Zallot R. Gene Graphics: A genomic neighborhood data visualization web application. *Bioinformatics.* 2018; 34(8):1406–8. <https://doi.org/10.1093/bioinformatics/btx793> PMID: 29228171
54. Imai K, Ishibashi N, Kodana M, Tarumoto N, Sakai J, Kawamura T, et al. Clinical characteristics in blood stream infections caused by *Klebsiella pneumoniae*, *Klebsiella variicola*, and *Klebsiella quasipneumoniae*: a comparative study, Japan, 2014–2017. *BMC Infect Dis* [Internet]. 2019; 19(1):1–10. Available from: <https://doi.org/10.1186/s12879-019-4498-x> PMID: 31703559
55. Watanabe N, Tomohisa W, Otsuka Yoshihito Yamagata Kazufumi Fujioka M. Clinical characteristics and antimicrobial susceptibility of *Klebsiella pneumoniae*, *Klebsiella variicola* and *Klebsiella quasipneumoniae* isolated from human urine in Japan. *J Med Microbiol* [Internet]. 2022; 71(6). Available from: <https://doi.org/10.1099/jmm.0.001546> PMID: 35699119
56. Xie M, Chen K, Chan EW- C, Zhang R, Chen S. Characterisation of clinical carbapenem-resistant K1 *Klebsiella quasipneumoniae* subsp. *similipneumoniae* strains harbouring a virulence plasmid. *Int J Anti-microb Agents* [Internet]. 2022; 60(2):106628. Available from: <https://www.sciencedirect.com/science/article/pii/S0924857922001406>
57. Yan JJ, Wang MC, Zheng PX, Tsai LH, Wu JJ. Associations of the major international high-risk resistant clones and virulent clones with specific ompK36 allele groups in *Klebsiella pneumoniae* in Taiwan. *New Microbes New Infect.* 2015; 5:1–4.
58. M D, M V, P SJ, Parkhill J. Evolution and epidemiology of multidrug-resistant *Klebsiella pneumoniae* in the United Kingdom and Ireland. *MBio* [Internet]. 2017; 8:e01976–16. Available from: <https://doi.org/10.1128/mBio.01976-16> PMID: 28223459
59. Bolourchi N, Naz A, Sohrabi M, Badmasti F. Comparative In silico characterization of *Klebsiella pneumoniae* hypervirulent plasmids and their antimicrobial resistance genes. *Ann Clin Microbiol Antimicrob* [Internet]. 2022; 21(1):1–9. Available from: <https://doi.org/10.1186/s12941-022-00514-6> PMID: 35655313
60. Du Pengcheng, Liu Chao, Fan Shuaihua, Baker Stephen G J. The Role of Plasmid and Resistance Gene Acquisition in the. 2022; 10(2):1–13.
61. Founou RC, Founou LL, Allam M, Ismail A, Essack SY. Whole Genome Sequencing of Extended Spectrum  $\beta$ -lactamase (ESBL)-producing *Klebsiella pneumoniae* Isolated from Hospitalized Patients in Kwa-Zulu-Natal, South Africa. *Sci Rep* [Internet]. 2019; 9(1):1–11. Available from: <https://doi.org/10.1038/s41598-019-42672-2> PMID: 31000772
62. Fortier L-C, Sekulovic O. Importance of prophages to evolution and virulence of bacterial pathogens. *Virulence.* 2013; 4(5):354–65. <https://doi.org/10.4161/viru.24498> PMID: 23611873
63. Wang ZC, Liu CJ, Huang YJ, Wang YS, Peng HL. PecS regulates the urate-responsive expression of type 1 fimbriae in *klebsiella pneumoniae* CG43. *Microbiol (United Kingdom).* 2015; 161(12):2395–409.
64. Struve C, Bojer M, Krogfelt KA. Characterization of *Klebsiella pneumoniae* type 1 fimbriae by detection of phase variation during colonization and infection and impact on virulence. *Infect Immun.* 2008; 76(9):4055–65.
65. Tarkkanen AM, Virkola R, Clegg S, Korhonen TK. Binding of the type 3 fimbriae of *Klebsiella pneumoniae* to human endothelial and urinary bladder cells. *Infect Immun.* 1997; 65(4):1546–9.
66. Palacios M, Miner TA, Frederick DR, Sepulveda VE, Quinn JD, Walker KA, et al. Identification of two regulators of virulence that are conserved in *Klebsiella pneumoniae* classical and hypervirulent strains. *MBio.* 2018; 9(4).
67. Lau CKY, Krewulak KD, Vogel HJ. Bacterial ferrous iron transport: The Feo system. *FEMS Microbiol Rev.* 2016; 40(2):273–98. <https://doi.org/10.1093/femsre/fuv049> PMID: 26684538
68. Russo TA, Olson R, MacDonald U, Metzger D, Maltese LM, Drake EJ, et al. Aerobactin mediates virulence and accounts for increased siderophore production under iron-limiting conditions by hypervirulent (hypermucoviscous) *Klebsiella pneumoniae*. *Infect Immun.* 2014; 82(6):2356–67.
69. Follador R, Heinz E, Wyres KL, Ellington MJ, Kowarik M, Holt KE, et al. The diversity of *Klebsiella pneumoniae* surface polysaccharides. *Microb genomics.* 2016; 2(8):e000073.
70. Hsu CR, Lin TL, Chen YC, Chou HC, Wang JT. The role of *Klebsiella pneumoniae* rmpA in capsular polysaccharide synthesis and virulence revisited. *Microbiology.* 2011; 157(12):3446–57.
71. Magistro G, Magistro C, Stief CG, Schubert S. The high-pathogenicity island (HPI) promotes flagellum-mediated motility in extraintestinal pathogenic *Escherichia coli*. *PLoS One.* 2017; 12(10):1–18. <https://doi.org/10.1371/journal.pone.0183950> PMID: 29016611

72. Lam MMC, Wick RR, Wyres KL, Gorrie CL, Judd LM, Jenney AWJ, et al. Genetic diversity, mobilisation and spread of the yersiniabactin-encoding mobile element ICEKp in *klebsiella pneumoniae* populations. *Microb Genomics*. 2018; 4(9).
73. Hancock V, Ferrières L, Klemm P. The ferric yersiniabactin uptake receptor FyuA is required for efficient biofilm formation by urinary tract infectious *Escherichia coli* in human urine. *Microbiology*. 2008; 154(1):167–75.
74. Storey D, McNally A, Åstrand M, Sa-Pessoa Graca Santos J, Rodriguez-Escudero I, Elmore B, et al. *Klebsiella pneumoniae* type VI secretion system-mediated microbial competition is PhoPQ controlled and reactive oxygen species dependent. *PLoS Pathog*. 2020 Mar; 16(3):e1007969. <https://doi.org/10.1371/journal.ppat.1007969> PMID: 32191774
75. Silverman JM, Brunet YR, Cascales E, Mougous JD. Structure and Regulation of the Type VI Secretion System. *Annu Rev Microbiol*. 2012; 66:453–472. <https://doi.org/10.1146/annurev-micro-121809-151619> PMID: 22746332
76. Ho BT, Fu Y, Dong TG, Mekalanos JJ. *Vibrio cholerae* type 6 secretion system effector trafficking in target bacterial cells. *Proc Natl Acad Sci U S A*. 2017; 114(35):9427–32.
77. Liu L, Ye M, Li X, Li J, Deng Z, Yao Yu-Feng, et al. Identification and characterization of an antibacterial type VI secretion System in the carbapenem-resistant strain *Klebsiella pneumoniae* HS11286. *Front Cell Infect Microbiol*. 2017; 7(OCT):1–8.
78. Dudley EG, Thomson NR, Parkhill J, Morin NP, Nataro JP. Proteomic and microarray characterization of the AggR regulon identifies a pheU pathogenicity island in enteroaggregative *Escherichia coli*. *Mol Microbiol*. 2006; 61(5):1267–82.
79. Wan B, Zhang Q, Ni J, Li S, Wen D, Li J, et al. Type VI secretion system contributes to Enterohemorrhagic *Escherichia coli* virulence by secreting catalase against host reactive oxygen species (ROS). *PLoS Pathog*. 2017; 13(3):1–28.
80. Ma J, Pan Z, Huang J, Sun M, Lu C, Yao H. The Hcp proteins fused with diverse extended-toxin domains represent a novel pattern of antibacterial effectors in type VI secretion systems. *Virulence* [Internet]. 2017; 8(7):1189–202. Available from: <https://doi.org/10.1080/21505594.2017.1279374> PMID: 28060574
